# Supplementary material for: Peripheral shift in the viable chondrocyte population of the medial femoral condyle after anterior cruciate ligament injury in the porcine knee
Source: PubMed Central journal article supplement (PMC8389427; doi:10.1371/journal.pone.0256765), 2021-08-26
Supplement: pone.0256765.s002.pdf [file pone.0256765.s002.pdf]

**Table S1. Outcomes by treatment group**

|                                           | Intact<br><br>(n=6)<br><br><i>Mean</i><br><i>(95% CI)</i> | 1 week                                      |                                             |                                             | 4 weeks                                     |                                             |                                             | 1 week                                        |                        |                           | 4 weeks                        |                        |                           |
|-------------------------------------------|-----------------------------------------------------------|---------------------------------------------|---------------------------------------------|---------------------------------------------|---------------------------------------------|---------------------------------------------|---------------------------------------------|-----------------------------------------------|------------------------|---------------------------|--------------------------------|------------------------|---------------------------|
|                                           |                                                           | Transection                                 | Reconstruction                              | Repair                                      | Transection                                 | Reconstruction                              | Repair                                      | Reconstruction vs. Transection                | Repair vs. Transection | Repair vs. Reconstruction | Reconstruction vs. Transection | Repair vs. Transection | Repair vs. Reconstruction |
|                                           |                                                           | (n=6)<br><br><i>Mean</i><br><i>(95% CI)</i> | (n=6)<br><br><i>Mean</i><br><i>(95% CI)</i> | (n=6)<br><br><i>Mean</i><br><i>(95% CI)</i> | (n=6)<br><br><i>Mean</i><br><i>(95% CI)</i> | (n=6)<br><br><i>Mean</i><br><i>(95% CI)</i> | (n=6)<br><br><i>Mean</i><br><i>(95% CI)</i> | (n=5-6)<br><br><i>Mean</i><br><i>(95% CI)</i> | <i>P value</i>         | <i>P value</i>            | <i>P value</i>                 | <i>P value</i>         | <i>P value</i>            |
| Area of irreversible cell injury (%)      | 0.0<br>(0.0, 0.0)                                         | 14.1<br>(-1.5, 29.8)                        | 20.0<br>(7.2, 32.9)                         | 5.9<br>(2.6, 9.3)                           | 16.2<br>(2.7, 29.6)                         | 24.6<br>(2.2, 46.9)                         | 17.3<br>(2.1, 32.5)                         | 1.000                                         | 1.000                  | 1.000                     | 1.000                          | 1.000                  | 1.000                     |
| Ki-67 expression (RPKM)                   | 0.14<br>(0.02, 0.27)                                      | 1.45<br>(0.77, 2.13)                        | 2.29<br>(1.29, 3.29)                        | 1.87<br>(1.22, 2.52)                        | 0.90<br>(0.57, 1.23)                        | 0.94<br>(0.61, 1.28)                        | 1.00<br>(0.81, 1.2)                         | 1.000                                         | 1.000                  | 1.000                     | 1.000                          | 1.000                  | 1.000                     |
| Superficial zone cell density (cells/mm2) | 872<br>(789, 955)                                         | 796<br>(594, 998)                           | 932<br>(836, 1029)                          | 965<br>(867, 1063)                          | 1183<br>(1044, 1322)                        | 998<br>(792, 1204)                          | 1039<br>(848, 1231)                         | 1.000                                         | 1.000                  | 1.000                     | 1.000                          | 1.000                  | 1.000                     |
| Mid zone cell density (cells/mm2)         | 385<br>(342, 427)                                         | 455<br>(417, 494)                           | 661<br>(584, 739)                           | 513<br>(440, 587)                           | 704<br>(579, 828)                           | 707<br>(570, 845)                           | 736<br>(550, 922)                           | 0.350                                         | 1.000                  | 0.964                     | 1.000                          | 1.000                  | 1.000                     |
| Deep zone cell density (cells/mm2)        | 410<br>(341, 480)                                         | 429<br>(375, 483)                           | 730<br>(607, 854)                           | 598<br>(456, 740)                           | 759<br>(669, 849)                           | 704<br>(553, 856)                           | 752<br>(571, 933)                           | 0.183                                         | 1.000                  | 1.000                     | 1.000                          | 1.000                  | 1.000                     |
| Total cell count                          | 7926<br>(7250, 8602)                                      | 8369<br>(5509, 11229)                       | 9385<br>(7742, 11028)                       | 7991<br>(6512, 9469)                        | 11327<br>(9687, 12967)                      | 7741<br>(5896, 9585)                        | 8525<br>(5042, 12008)                       | 1.000                                         | 1.000                  | 1.000                     | 0.367                          | 1.000                  | 1.000                     |
| Mean mediolateral cell position (%)       | 50<br>(48.1, 52)                                          | 58.7<br>(50.2, 67.2)                        | 57.3<br>(51.8, 62.8)                        | 54.9<br>(52.5, 57.3)                        | 63.5<br>(57.7, 69.4)                        | 60.4<br>(53.6, 67.1)                        | 60.1<br>(50.5, 69.6)                        | 1.000                                         | 1.000                  | 1.000                     | 1.000                          | 1.000                  | 1.000                     |

Cell density measurements exclude areas of irreversible cell injury; One 4-week sample was too disrupted to define the superficial, mid, and deep zones and was excluded from the analyses of these three measures.
